# 1 Spatio-temporal organization of cell assemblies 2 in Nucleus Reuniens during slow oscillations.

3 David Angulo-Garcia<sup>1,\*</sup>, Maëva Ferraris<sup>2,\*</sup>, Antoine Ghestem<sup>2</sup>, Christophe Bernard<sup>2</sup>,  
4 Pascale P Quilichini<sup>2</sup>

5 <sup>1</sup> **Grupo de Modelado Computacional. Instituto de Matematicas Aplicadas,**  
6 **Universidad de Cartagena, Cartagena, Colombia**

7 <sup>2</sup> **Aix Marseille Univ, INSERM, INS, Inst Neurosci Syst, Marseille, France**

8 *\* These authors contributed equally*

9 **Abbreviated Title:** Sequences in Nucleus Reuniens

10 **Corresponding Author:**

11 Pascale P Quilichini

12 Institut de Neurosciences des Systèmes - INSERM U1106- Aix-Marseille Université

13 Faculté de Médecine - Campus Santé Timone

14 27 bd Jean Moulin - 13005 Marseille - France

15 Tél : +33 (0)4 91 32 42 31 - Fax : +33 (0)4 91 78 99 14

16 Email: pascale.quilichini@univ-amu.fr

17 **Keywords:**

18 Cell assemblies; Hippocampus; Prefrontal cortex; Nucleus reuniens; Slow oscillations;

19 Sequences.

20 **Acknowledgments:**

21 This work was supported by grants from the FRM (Fondation Recherche Médicale

22 FDT201805005246 to M. F.). D.A-G was received support by the A\*MIDEX grant (No.

23 ANR-11-IDEX-0001-02). We thank Wesley Clawson for proofreading this manuscript.

24 **Author Contributions:**

25 M.F. and P.P.Q. designed the experiments. M.F. and P.P.Q. performed the experiments.  
26 A.G. assisted in performing experiments. D.A.G., M.F. and P.P.Q. interpreted the results  
27 and performed the analysis. All the authors reviewed and edited the manuscript.

28 **Declaration of Interests:**

29 The authors declare no competing interests.

---

30 **Abstract** The nucleus reuniens (NR) is an important anatomical and functional relay  
31 between the medial prefrontal cortex (mPFC) and the hippocampus (HPC). Whether the  
32 NR controls neuronal assemblies - a hallmark of information exchange between the HPC  
33 and mPFC for memory transfer/consolidation - is not known. Using simultaneous LFP  
34 and unit recordings in NR, HPC and mPFC in rats during slow oscillations under  
35 anesthesia, we identified a reliable sequential activation of NR neurons at the beginning  
36 of UP states, which preceded mPFC ones. NR sequences were spatially organized, from  
37 dorsal to ventral NR. Chemical inactivation of the NR disrupted mPFC sequences at the  
38 onset of UP states as well as HPC sequences present during sharp-wave ripples. We  
39 conclude that the NR contributes to the coordination and stabilization of mPFC and HPC  
40 neuronal sequences during slow oscillations, possibly via the early activation of its own  
41 sequences.

---

## 42 Introduction

43 Information exchange between the hippocampus (HPC) the medial prefrontal cortex (mPFC) is  
44 essential for different memory processes, including consolidation (**Siapas and Wilson, 1998,**  
45 **Frankland and Bontempi, 2005, Maingret et al., 2016, Eichenbaum, 2017, Kitamura et al.,**  
46 **2017, Latchoumane et al., 2017, Preston and Eichenbaum, 2013**). In both regions, the  
47 representation of information is supported by the recruitment of cell assemblies of neurons  
48 which fire in a fine time-resolved manner (**Lee and Wilson, 2002, Euston et al., 2007, Luczak**  
49 **et al., 2007, Pastalkova et al., 2008, Luczak et al., 2015, Peyrache et al., 2009, Battaglia et**  
50 **al., 2011, Skaggs and McNaughton, 1996, Nadasdy et al., 1999**). These neuronal assemblies  
51 display a precise temporal sequential activation, which reflects the encoded information  
52 (**Pfeiffer, 2017, Marre et al., 2009, Davidson et al., 2009, Foster and Wilson, 2006, Ji and**  
53 **Wilson, 2007, Nádasdy, 2000**). Such activity occurs mainly during sleep, particularly during  
54 non-REM sleep, and is organized in space and time by a set of oscillations, such as hippocampal  
55 sharp-wave ripples, cortical slow oscillations and spindles (**Sirota et al., 2003, Sirota and**  
56 **Buzsáki, 2005, Maingret et al., 2016, Staresina et al., 2015**). Yet, how these cells assemblies  
57 are finely coordinated between HPC and mPFC to support memory consolidation is not well  
58 understood. The thalamic nucleus reuniens (NR), which bi-directionally connects the HPC and  
59 mPFC (**Herkenham, 1978, Van der Werf et al., 2002, Vertes, 2006, Varela et al., 2014**), plays  
60 a key role in memory consolidation (**Loureiro et al., 2012, Cassel et al., 2013, Pereira de**  
61 **Vasconcelos and Cassel, 2015**), and synchronizes gamma bursts between HPC and mPFC  
62 during non-REM sleep (**Ferraris et al., 2018**). The NR is therefore ideally posed to orchestrate  
63 the dynamics of cell assemblies in both regions.

## 64 Results

### 65 Cell assemblies are recruited in NR at UP state onset

66 We first assessed the behavior of NR (n=166 cells, n=5 rats), mPFC (n=496, n=7) and HPC  
67 (n=163, n=4) neurons during slow oscillations (SO) in anesthetized rats. Slow oscillations during  
68 anesthesia share similar features as non-REM sleep (**Ferraris et al., 2018**) and offer the  
69 advantages of long duration stable recordings necessary to identify statistically significant  
70 sequences. Neighboring thalamic neurons (antero-median and ventro-median nuclei) were also  
71 recorded as a control group ("TH", 89 neurons, n=4).

72 During SO, most of the neurons fired at the onset of the UP states, mainly in mPFC and NR  
73 (**Figure 1A**) (**Ferraris et al., 2018**). To identify any ordering in this firing activity, we ranked  
74 each neuron according to its mean preferred SO phase (Figure 1Ba). Neurons were organized  
75 in increasing order of average preferred phase, defining a *template order* (Figure 1Bb). With this  
76 ordering, we found a robust recruitment of neuronal sequences at the UP state onset in NR  
77 (median percentage of recruited neurons per UP state 70.35 %, min/max: 61.13 / 85.85 %), and  
78 mPFC (median: 62.9 %, min/max: 42.06 / 70.02 %). In comparison, HPC neurons showed less  
79 sequential activation (median: 33.82 %, min/max: 29.26 / 46.42 %, **Figure 1B**). However, HPC  
80 neurons displayed better sequential activation during sharp wave ripples (SPW-Rs), which tend  
81 to occur at the end of the SO cycle (**Sirota et al., 2003, Isomura et al., 2006, Buzsáki, 2015,**  
82 **Khodagholy et al., 2017, Battaglia et al., 2004, Maingret et al., 2016**) (median: 45 %,  
83 min/max: 35 / 64 %). Sequences in NR always preceded mPFC ones (**Figure 1B**). As a negative  
84 control, we analyzed the activity of neighboring thalamic nuclei (TH) neurons. Although TH  
85 neurons displayed a strong entrainment by SO (**Ferraris et al., 2018**), there was poor sequential  
86 activity (**Figure 1B**). The sequential activity at UP state onset therefore appears to be specific of  
87 NR and mPFC neurons in the areas investigated here. As a further control, we analyzed the

88 activity of NR neurons during epochs dominated by theta (4-6 Hz) oscillations. We did not find  
89 stable sequential neuronal assemblies during theta (data not shown). Together, these results  
90 show that, at the beginning of UP states, cell assembly formation occurs first in NR, then in  
91 mPFC and marginally in the HPC and neighboring thalamic nuclei.

92 We then quantified the reliability of these sequences. To do so, we computed at each UP state  
93 the activation latency of each neuron relative to the population peak activity (**see Methods**). The  
94 local activation order of the cell assembly was determined from the ascending sorting of the  
95 activation latencies. We then measured the Spearman rank correlation between the local  
96 activation order and the template order. A rank correlation  $r = 1$  indicates that the sequential  
97 activation follows exactly the template order determined previously by the average phase  
98 preferences. For NR neurons, the template order was significantly expressed in 32% of the total  
99 number of UP states (min = 15%, max = 37 %, Spearman test,  $p < 0.01$ ), while mPFC reliable  
100 sequences were found in only 25 % of the UP states (min/max = 5 / 31 %, **Figure 1C**). In  
101 contrast, reliable HPC sequences were only detected in 2 % of UP states (min/max = 1 / 6 %)  
102 and in 2 % for sequences in TH neurons (min/max = 1 / 14 %). Although the proportion of  
103 reliable sequences in NR and mPFC were not significantly different (KS-test,  $p = 0.15$ ), the  
104 average Spearman correlation values of the reliable sequences were significantly larger in NR  
105 than in mPFC (KS-test,  $p < 0.01$ , **Figure 1D**), indicating that the NR cell assembly sequential  
106 organization is the most consistent. To estimate the participation of neurons in sequence  
107 generation, we calculated a participation index, defined as the probability for a given neuron to  
108 be involved in a given sequence (see Methods). The participation index was consistently larger  
109 across experiments in NR (median: 0.63, min/max: 0.55 / 0.81) than in mPFC (median: 0.52,  
110 min/max: 0.36 / 0.60; KS-test,  $p < 0.05$ ). Thus, mPFC and NR are characterized by highly stable

111 patterns of sequential neuronal activations at the onset of the UP state, with NR sequences  
112 being more reproducible.

### 113 **NR cell assemblies are spatially distributed**

114 We also investigated the spatial distribution of the NR and mPFC cells assemblies. For each UP  
115 state, we correlated the local activation order of each neuron to their anatomical dorso-ventral  
116 localization (**Figure 2A**). The slope of a linear fit of such correlation provides the information on  
117 whether the activity is propagating in a given direction (**Luczak et al., 2007**) (see Methods,  
118 **Figure 2B**). Even though both NR and mPFC can show some degree of propagation in a  
119 preferential direction, NR average slopes were consistently larger than mPFC ones (KS-test,  $p <$   
120  $0.05$ , **Figure 2C**), reflecting a dorsal-to-ventral direction of propagation of the neuronal  
121 activations. To assess the consistency of the preferential direction of propagation, we calculated  
122 the Spearman rank correlation between the rank of the template order and the anatomical  
123 location of the corresponding recording site. We found a highly significant correlation in NR  
124 recordings in most cases ( $n = 4$  out of 5, median  $|r|$  value across all  $n$ :  $0.65$ ,  $p < 0.001$ ),  
125 whereas it was virtually absent in mPFC ( $n = 1$  out of 7,  $|r| = 0.35$ ,  $p < 0.01$ ) (**Figure 2D**). There  
126 are thus more spatially organized sequences in NR as compared to mPFC (z-test,  $p < 0.05$ ,  
127 **Figure 2E**).

128 Altogether, these results demonstrate that NR displays at the UP state onset robust sequential  
129 activations which are spatially organized in a dorso-ventral stream. This is particularly surprising  
130 as it suggests a topical spatial organization of the neuronal output in the NR.

### 131 **NR activity is necessary to the mPFC and HPC sequences stability**

132 The fact that NR cell assemblies are generated before mPFC and HPC ones raises the  
133 possibility that NR neurons may control mPFC and HPC sequences. To test this hypothesis, we

134 performed chemical inactivation of NR using Muscimol (see Methods) and recorded the activity  
135 of mPFC neurons ( $n=140$ ,  $n=3$ ) and HPC ( $n=71$ ,  $n=3$ ) neurons. Following NR inactivation, mPFC  
136 neurons showed a less rich activity during the UP state as compared to non-inactivation, control  
137 recordings (**Figure 3A**) (**Ferraris et al., 2018**). A hallmark of highly active, long-lasting firing of  
138 cells in control conditions is the broad distribution of inter-spike intervals (ISI) smaller than 0.5 s.  
139 The distribution was much narrower in inactivation conditions (**Figure 3B**). We then calculated  
140 the distribution of the pooled variability of the activity peak triggered histogram (APTH, **see**  
141 **methods and Figure 3C insert**) in control and NR inactivation conditions. The median APTH  
142 variability across experiments was consistently lower when NR is inactivated (control median:  
143 9.62, min/max: 8.98 / 10.60, NR inactivation median: 8.92, min/max: 8.67 / 9.02, KS-test,  $p < 0.05$ ),  
144 as shown in **Figure 3C**. Moreover, the UP state duration was slightly shorter (control: 0.55 s, NR  
145 inactivation: 0.48 s, Mann-Whitney test,  $p < 0.001$ ), as revealed by the extra peak in UP state  
146 duration distribution around 0.25 s, which did not exist in control data (**Figure 3D**). We then  
147 evaluated the outcome of the mPFC sequences in such conditions. First, NR activity suppression  
148 resulted in a reduced capacity of mPFC to generate reliable sequences as compared to control  
149 condition since only 6.5% of them (min = 4.0% max = 8.4%) were reliable (as compared to  
150 control median: 25%, min/max: 5 / 30 %, KS-test,  $p < 0.05$  **Figure 3E**). Moreover, the fraction of  
151 participating neurons in reliable sequences decreased in such condition (control: 53%;  
152 inactivation: 38%; KS-test,  $p < 1e-5$ ; **Figure 3F**). These results support the proposal that NR  
153 controls the stability and reliability of mPFC sequences.

154 The UP state of the SO poorly modulates the activity of HPC neurons and the formation of timely  
155 organized cell assemblies, however, SPW-Rs are more likely to trigger a sequential activation of  
156 HPC firing (**Buzsáki, 2015**). We therefore investigated the consequences of NR inactivation on  
157 HPC sequences during SPW-Rs. NR inactivation did not affect HPC neurons firing rate (control

158 median: 70 Hz, min/max: 41 / 85 Hz, NR inactivation median: 52.59 Hz, min/max: 33 / 71 Hz,  
159 KS-test,  $p=0.97$ , **Figure 4A**). In addition, NR inactivation did not alter the frequency of SPW-Rs  
160 occurrence (median control: 0.087 Hz, min/max: 0.043 / 0.11 Hz, NR inactivation: 0.029 Hz,  
161 min/max: 0.022 / 0.049 Hz, KS-test,  $p=0.32$ , **Figure 4B**). Similarly, neither their power (mean  
162 normalized power control:  $157 \pm 2$ , NR inactivation:  $144 \pm 5$ , T-test,  $p=0.295$ ; Figure 4C bottom  
163 panel) nor their inner frequency (mean frequency control:  $193 \pm 1$  Hz, NR inactivation:  $213 \pm 3$   
164 Hz, T-test,  $p=0.084$ , **Figure 4C** top panel) were modified. In contrast, the number of reliable  
165 sequences found within SWP-Rs was drastically reduced (control median: 20%, NR inactivation  
166 median: 2%, z-test,  $p<0.001$ ; **Figure 4D**). Besides, the remaining cell assemblies recruited a  
167 significantly lower number of neurons (control median: 37.5 %, min/max: 12.5% / 80%, NR  
168 inactivation median: 8.3 %, min/max: 0% / 66.7%, KS-test,  $p<0.001$ , **Figure 4E**). These findings  
169 support the proposal that NR also controls the sequential organization of neuronal firing in HPC  
170 during SWP-Rs.

## 171 Discussion

172 In this study, we showed that  $\frac{2}{3}$  of NR neurons fire within robustly spatially and temporally  
173 organized cell assemblies at UP state onset; and that NR activity controls cell assemblies'  
174 stability in mPFC at UP state onset and in HPC during SPW-Rs. These results further support the  
175 concept that the NR is a key functional hub in memory networks involving the medial prefrontal  
176 cortex and hippocampus.

177 The sequential activation of neuronal assemblies constitutes a core feature of information  
178 processing in the brain (**Tonegawa et al., 2018**). Cell assemblies are found in archicortical (**Lee**  
179 **and Wilson, 2002**, **Pastalkova et al., 2008**, **Villette et al., 2015**, **Malvache et al., 2016**, **Harris**  
180 **et al., 2003**, **Dragoi and Buzsáki, 2006**) and cortical areas (**Euston et al., 2007**, **Luczak and**



181 **Maclean, 2012, Luczak et al., 2007, Kenet et al., 2003, MacLean et al., 2005, Ferezou et al.,**  
182 **2006)** (as well as in striatum (**Lansink et al., 2009**)). They constitute a way to code/encode/store  
183 information (**Maass, 2016, Kitamura et al., 2017**). During non-REM sleep, cortical activity is  
184 dominated by the sequential activation of cortical neurons at the onset of the UP state, while, in  
185 the hippocampus, the sequential activation mostly occurs during SPW-Rs at the end on the slow  
186 oscillation cycle (**Sirota et al., 2003, Battaglia et al., 2004, Maingret et al., 2016, Khodagholy**  
187 **et al., 2017, Peyrache et al., 2009**). Similar sequential firing occurs during the slow oscillations  
188 measured during anesthesia (**Luczak et al., 2007**), supporting the view that such brain state  
189 shares many features with non-REM sleep (**Tung and Mendelson, 2004, Clement et al., 2008,**  
190 **Isomura et al., 2006, Quilichini et al., 2010, Hutt, 2011, Ferraris et al., 2018**). Whether  
191 sequences represent internally generated representations or preconfigured cell assemblies  
192 (**Pastalkova et al., 2008, Dragoi and Tonegawa, 2012, Liu et al., 2018**) or a functional  
193 template of offline replay in the framework of memory consolidation (**Buzsáki, 2015, Lee and**  
194 **Wilson, 2002, Pfeiffer, 2017**) still remains to be elucidated, yet this work shows that they can  
195 also be recorded during anesthesia in this thalamic nucleus (**Bermudez Contreras et al.,**  
196 **2013**). The way mPFC and HPC sequences are generated remains poorly understood. Our  
197 results demonstrate that NR activity is a key regulator of mPFC and HPC sequence stability.  
198 Although the basic dynamical properties of UP states and SPW-Rs were mostly not affected by  
199 NR activation, mPFC and HPC sequences were considerably disrupted. The NR is ideally  
200 located for this, as it is bi-directionally connected to the mPFC and HPC (**Vertes, 2006, Cassel**  
201 **et al., 2013, Varela et al., 2014**). The fact that NR sequences always precede mPFC ones at UP  
202 state onset suggests that NR cells may directly drive mPFC cells. In keeping with this proposal,  
203 NR neurons have an excitatory action on HPC and mPFC (**Dolleman-Van der Weel et al.,**  
204 **1997, Dolleman-Van der Weel and Witter, 2000, Di Prisco and Vertes, 2006**) by

205 modulating/activating both interneurons and principal cells. However, the control of sequences  
206 during hippocampal SPW-Rs is more difficult to explain as SPW-Rs occur at variable times after  
207 UP state onset (**Sirota et al., 2003, Battaglia et al., 2004**).

208 The presence of sequences specifically in the NR is quite remarkable (sequences were not  
209 found in neighboring thalamic nuclei). Since NR neurons are involved in reference memory  
210 consolidation (**Loureiro et al., 2012**) and in spatial memory (**Jankowski et al., 2014, Ito et al.,  
211 2015, Jankowski et al., 2015, Ali et al., 2017, Cholvin et al., 2018**), NR sequences may  
212 constitute an activity template used to organize information at the beginning of the UP state (i.e.  
213 a default activity in a default mode (**Sanchez-Vives and Mattia, 2014**)), in order to transmit it to  
214 the target areas in a packet-based manner (**Luczak et al., 2015**).

215 Another remarkable feature of NR sequences is that their dorso-ventral organization, suggesting  
216 a precise topological organization in terms of afferences and efferences, despite the fact that NR  
217 does not have a layered organization (**Jones, 1985, Bokor et al., 2002, Van der Werf et al.,  
218 2002**). Studies report topographically (dorso-ventral) organized inputs to NR (from subiculum  
219 (**Van der Werf et al., 2002, McKenna and Vertes, 2004**), but most of the differences involve  
220 the rostro-caudal axis (**Cassel et al., 2013**). However, a fuzzy dorso-ventral gradient has been  
221 reported on the NR output to the temporal lobe (**Dolleman-Van Der Weel and Witter, 1996,  
222 Vertes et al., 2006**). There is also no available information on the local connectivity among NR  
223 neurons, except a caudal to rostral pathway (**Dolleman-Van der Weel et al., 1997**). The NR  
224 includes difference cell types, but the lack of specific molecular markers prevents, so far, a  
225 proper optogenetic investigation (**Bokor et al., 2002, Walsh et al., 2017**).

226 In conclusion, our results further support the concept that the NR plays a key role as an  
227 anatomical and functional hub between the mPFC and HPC. The control it exerts on mPFC and  
228 HPC information packets suggests that it strongly participates in the organization of information

229 in both regions but also in the transfer of information from the HPC to mPFC. Its internal  
230 organization allows the genesis of information packet sequences, which may represent similar  
231 features as those coded in the mPFC and HPC.

## 232 **Materials and Methods**

### 233 **Contact for Reagent and Resource Sharing**

234 Further information and requests for resources may be directed to and will be fulfilled by the  
235 Lead Contact, Dr. Pascale P. Quilichini ([pascale.quilichini@univ-amu.fr](mailto:pascale.quilichini@univ-amu.fr)).

### 236 **Key Resources Table**

| Reagent type (species)<br>or resource | Source        | Identifier                    |
|---------------------------------------|---------------|-------------------------------|
| <i>Animals</i>                        |               |                               |
| Wistar Han IGS rats                   | Charles River | RRID:RGD_2308816              |
| <i>Chemicals</i>                      |               |                               |
| Urethane                              | Sigma-Aldrich | Cat#U2500;<br>CAS: 51-79-6    |
| Isoflurane                            | Baxter        | CAS: 26675-46-7               |
| Ketamine                              | Renaudin      | Cip: 3400957854195            |
| Xylazine                              | CENTRAVET     | Cat#ROM001<br>CAS: 7361-61-7  |
| Sodium pentobarbital                  | CEVA          | CAS: 76-74-4                  |
| Paraformaldehyde                      | Carlo Erba    | Cat#387507<br>CAS: 30525-89-4 |
| NeuroTrace 500/5225                   | Invitrogen    | Cat#N21480                    |
| Green Fluorescent Nissl Stain         |               |                               |
| Muscimol BODIPY TMR-X<br>Conjugate    | Invitrogen    | Cat#M23400                    |
| DilC18(3)                             | Interchim     | Cat#46804A<br>CAS: 41085-99-8 |
| <i>Software and Algorithms</i>        |               |                               |
| MATLAB v2013b                         | MathWorks     | RRID:SCR_001622               |
| MATLAB v2015b                         | MathWorks     | RRID:SCR_001622               |

|                                                                                                                |                                                                                                                       |                                    |
|----------------------------------------------------------------------------------------------------------------|-----------------------------------------------------------------------------------------------------------------------|------------------------------------|
| Circular Statistics Toolbox                                                                                    | <a href="https://philippberens.wordpress.com/code/circstats/">https://philippberens.wordpress.com/code/circstats/</a> | Berens, P. (2009).                 |
| KlustaKwik                                                                                                     | <a href="http://klustakwik.sourceforge.net">http://klustakwik.sourceforge.net</a><br>Harris et al., 2000              | RRID:SCR_008020<br>RRID:SCR_014480 |
| Klusters                                                                                                       | <a href="http://neurosuite.sourceforge.net">http://neurosuite.sourceforge.net</a><br>Hazan et al., 2006               | RRID:SCR_008020                    |
| NeuroScope                                                                                                     | <a href="http://neurosuite.sourceforge.net">http://neurosuite.sourceforge.net</a><br>Hazan et al., 2006               | RRID:SCR_008020                    |
| NDManager                                                                                                      | <a href="http://neurosuite.sourceforge.net">http://neurosuite.sourceforge.net</a><br>Hazan et al., 2006               | RRID:SCR_008020                    |
| Other                                                                                                          |                                                                                                                       |                                    |
| Digital Neuralynx recording system (32 kHz sampling)                                                           | Neuralynx                                                                                                             | Model: 64-channel Digital Lynx     |
| Pulse oximeter                                                                                                 | Starr life sciences                                                                                                   | MouseOx                            |
| Motorized manipulator                                                                                          | Scientifica                                                                                                           | Scientifica IVM single             |
| Silicon probe<br>32 aligned sites (177 $\mu$ m <sup>2</sup> ), 20 $\mu$ m spacing, 50 $\mu$ m thick, 10mm long | NeuroNexus                                                                                                            | A1x32-Edge-10mm-20-177-H32-50      |
| Silicon probe<br>32 aligned sites (177 $\mu$ m <sup>2</sup> ), 20 $\mu$ m spacing, 15 $\mu$ m thick, 5mm long  | NeuroNexus                                                                                                            | A1x32-Edge-5mm-20-177-H32-15       |
| Silicon probe<br>32 aligned sites (177 $\mu$ m <sup>2</sup> ), 50 $\mu$ m spacing, 15 $\mu$ m thick, 6mm long  | NeuroNexus                                                                                                            | A1x32-6mm-50-177-H32-15            |
| Vibratome                                                                                                      | Leica                                                                                                                 | VT1000S                            |
| Stereotaxic frame                                                                                              | Kopf                                                                                                                  | #962                               |
| Syringe 75RN 5 $\mu$ l                                                                                         | Hamilton                                                                                                              | Cat#87930                          |
| Needle 33 gauge                                                                                                | Hamilton                                                                                                              | Cat#7803-05                        |
| UltraMicroPump                                                                                                 | World precision instrument                                                                                            | UMP3-1                             |

## 237 **Experimental Model and Subject Details**

238 All experiments were performed in accordance with experimental guidelines approved by Aix-  
 239 Marseille University Animal Care and Use Committee. A total of 16 rats were used in this study.  
 240 Part of these data (14 Wistar Han rat data) were used in a previously published study (**Ferraris**  
 241 **et al., 2018**), and 2 Wistar Han rats are original data. They include local field potentials (LFPs)  
 242 and single-unit recordings made in the mPFC, HPC and NR of anesthetized rats.

## 243 **Animal surgery**

244 Wistar Han IGS male rats (250-400g; Charles River) were anesthetized with urethane (1.5 g/kg,  
245 i.p.) and ketamine/xylazine (20 and 2 mg/kg, i.m.), additional doses of ketamine/xylazine (2 and  
246 0.2 mg/kg) being supplemented during the electrophysiological recordings. The heart rate,  
247 breathing rate, pulse distension and the arterial oxygen saturation were also monitored with an  
248 oximeter (MouseOx, Starr Life Science) during the entire duration of the experiment to ensure  
249 the stability of the anesthesia and monitor the vital constants. The head was secured in a  
250 stereotaxic frame (Kopf, Phymep) and the skull was exposed and cleaned. Two miniature  
251 stainless-steel screws, driven into the skull, served as ground and reference electrodes. Up to  
252 three craniotomies were performed to target, from bregma: the pre-limbic area of the medial  
253 prefrontal cortex (mPFC) at +3 mm AP and +0.8 mm ML; the CA1 field of the intermediate  
254 hippocampus (HPC) at -5.6 mm AP and +4.3 mm ML; and the nucleus reuniens (NR) at -1.8 mm  
255 AP and -2 mm ML. Silicon probes (NeuroNexus) were used to record from these structures: a  
256 A1x32-Edge-5mm-20-177-H32-15 probe placed at [-2.5 -3.1] mm from brain surface to reach  
257 mPFC layer 5; a A1x32-Edge-10mm-20-177-H32-50 32-site probes placed at -7.2 mm from  
258 brain surface to reach the NR; a HPC A1x32-6mm-50-177-H32-15 probe placed at [-2.8 -3.0]  
259 mm perpendicularly to the CA1 field from stratum oriens to stratum lacunosum moleculare in  
260 the HPC. All the probes were lowered inside the brain with a motorized manipulator (Scientifica).  
261 For the NR inactivation experiments (n = 3 rats), a local injection of a fluorophore-conjugated  
262 muscimol (BODIPY-MSCI TMR-X Conjugate, Invitrogen) was performed in the NR and data from  
263 the mPFC and the HPC (CA1) were simultaneously acquired. The injection needle (33 gauge,  
264 Hamilton) was inserted in the NR (using the same depth coordinates as the probes and mounted  
265 on the same micromanipulator) and 0.70 nmol of muscimol in 0.3  $\mu$ l of PBS (**Ferraris et al.,**  
266 **2018**) was delivered over 60s through a micropump (UltraMicroPump, WPI). The needle was left

267 in place for 3 additional minutes to allow for adequate diffusion of the drug, then carefully  
268 removed.

269 At the end of the recording, the animals were injected with a lethal dose of Pentobarbital Na  
270 (150mg/kg, i.p.) and perfused intracardially with 4% paraformaldehyde solution in phosphate  
271 buffer (0.12M). The position of the electrodes (DiC18(3), InterChim) was applied on the back of  
272 the probe before insertion) was confirmed histologically on Nissl-stained 60  $\mu$ m sections  
273 (NeuroTrace 500/5225 Green Fluorescent Nissl Stain, Invitrogen). Only experiments with  
274 appropriate position of the probe were used for analysis (Figure 2A).

## 275 **Data collection and initial analysis**

276 Extracellular signal recorded from the silicon probes was amplified (1000x), bandpass filtered (1  
277 Hz to 5 kHz) and acquired continuously at 32 kHz (64-channel DigitalLynx; Neuralynx) at 16-bit  
278 resolution. Raw data were preprocessed using a custom-developed suite of programs  
279 **(Csicsvari et al., 1999)**. After recording, the signals were downsampled to 1250 Hz for the local  
280 field potential (LFP). Spike sorting was performed automatically, using KLUStAKWIK (Harris et  
281 al., 2002), followed by manual adjustment of the clusters, with the help of autocorrelogram,  
282 cross-correlogram and spike waveform similarity matrix (KLUSTERS software, **(Hazan et al.,**  
283 **2006)**. After spike sorting, the spike features of units were plotted as a function of time, and the  
284 units with signs of significant drift over the period of recording were discarded. Moreover, only  
285 units with clear refractory periods and well-defined cluster were included in the analyses.  
286 Recording sessions were divided into brain states of theta and slow oscillation periods. The  
287 epochs of stable slow oscillations (SO) periods were visually selected respectively from the  
288 ratios of the whitened power in the slow oscillations band (1-2 Hz) and the power of the

289 neighboring band (20-30 Hz) of mPFC or NR LFP and assisted by visual inspection of the raw  
290 traces (**Quilichini et al., 2010**).

291 Neurons were assigned as "NR neurons" by determining the approximate location of their  
292 somata relative to the recording sites, the known distances between the recording sites, the  
293 histological reconstruction of the recording electrode tracks and subsequent estimation of the  
294 recording sites. All the neurons recorded from sites located near the close contour of the NR  
295 were discarded. Neurons located at a minimal distance of 200 $\mu$ m of NR border and located  
296 within contours of the ventro-median, submedian or antero-median thalamic nuclei were  
297 classified as "other thalamic neurons" and used in the analysis (**Ferraris et al., 2018**).

## 298 **Data post-processing**

299 From the spike times, the instantaneous firing rates of each cell was calculated by counting the  
300 number of spikes inside a window of 50 ms, in overlapping intervals of 10 ms. The population  
301 firing rate was estimated averaging the single cell firing rates at each 10ms interval. Both the  
302 population rate and the single cell firing rate were smoothed with a Gaussian kernel of 5ms  
303 width. Peaks of population activity (AP) were identified as the points where the population rate  
304 amplitude was larger than the average rate plus 1 standard deviation. A separation between two  
305 consecutive peaks of at least 600 ms was imposed on the peak detection algorithm to avoid  
306 multiple peaks of activity within one up-state. For visualization purposes, all firing rate's heat  
307 maps were normalized with the peak firing rate for each cell to guarantee a variation between  
308 [0:1].

## 309 **Phase analysis and sequence identification**

310 LFP signals (from mPFC or NR) during slow oscillation phase were band-pass filtered between  
311 0.5 Hz and 2 Hz with a second order Butterworth filter to extract only the UP/DOWN transitions.

312 The time evolution of the phase during the UP/DOWN cycle was extracted performing the  
313 Hilbert transform of the filtered LFP. We used Rayleigh circular statistics (**Ferraris et al., 2018,**  
314 **Berens, 2009**) to compute the mean phase at which each neuron fires ("preferred phase") and  
315 to build their firing-phase histograms (Figure 1Ba). For visualization purposes, the resulting  
316 histograms depicted in the heat maps were normalized with the peak value of the distribution.  
317 For each cell, we then calculated a resultant vector characterized by an angle describing the  
318 average preferred phase and a magnitude with values between [0 1], quantifying the coherence  
319 of the phases. The template order was obtained by organizing the average preferred phase in  
320 increasing order (0 to  $2\pi$ ).

### 321 **Sequence reliability, sequence velocity and participation index**

322 We extracted the UP state duration as described in (**Ferraris et al., 2018**). At each UP state, the  
323 local activation order was calculated by measuring the time lag between the first activation of  
324 each neuron relative to the AP in a +/- 200ms window. Ordering the latencies in increasing order  
325 resulted in the local activation order. The reliability of a given sequence within a population peak  
326 was quantified as the Spearman rank correlation of the template order and the local activation  
327 order in that particular UP state. Sequences were considered reliable above 99% significance  
328 level. For each reliable sequence, the velocity of sequential activation was computed as the  
329 slope of a robust fit between the local activation order and the activation latency. To assess  
330 whether a neuron participated in a given sequence, the outliers in the robust fit were identified  
331 as those whose residual value were larger than twice the standard deviation of the residuals in  
332 the robust fit. The participation index is then calculated as the mean fraction of neurons that  
333 participated in the sequences of a recording session. A second linear fit between the local  
334 activation latency and the site of the linear probe closest to the neuron gives a measure of the



335 directionality of the sequence activation. A slope of the fit different than 0 implies an activation  
336 towards a given direction. Since this slope has units of time/electrode site, we multiplied the  
337 resulting value by 32 (the number of sites in the electrode) to account for the time required for a  
338 sequence to travel along the electrode.

### 339 **Activity peak triggered histogram (APTH)**

340 Storing the values of activation time lag relative to the AP at each UP state allows us to compute  
341 the so-called activity peak triggered histogram for each cell. With the APTH it is possible to  
342 assess the statistics of the firing latencies in the neighborhood of the UP state (+/- 200 ms).  
343 Once the APTH is obtained, one can calculate the variability of the activation lags as a measure  
344 of the firing extent around the peak reported in Figure 3C. Variability of the APTH can be  
345 calculated in analogy to the variance of a probability distribution function where  $\tau$  is the mean  
346 value of the APTH (See Figure 3C insert).

### 347 **SPW-Rs detection and analysis**

348 The procedure of SPW-Rs detection in the HPC stratum pyramidale LFP was based on those  
349 described previously (**Ferraris et al., 2018, Isomura et al., 2006**). Briefly, the LFP was digitally  
350 bandpass filtered [80 250] Hz, and the power (root-mean-square) of the filtered signal was  
351 calculated. The mean and SD of the power signal were calculated to determine the detection  
352 threshold. Oscillatory epochs with a power of 5 or more SD above the mean were detected. The  
353 beginning and the end of oscillatory epochs were marked at points where the power fell 0.5 SD.  
354 Once the SPW-Rs were detected, the SPW-R half time was calculated as the average between  
355 the start and the end of it. Then, the APTH for each cell was computed, taking each SPW-R half  
356 time as the activity peak. To test whether a cell robustly participates in the SPW-Rs, we  
357 compared the APTH against a uniform distribution with identical mean and standard deviation.

358 Cells whose APTH were different from the flat distribution above a 95% level were considered  
359 as robustly participating in the SPW-Rs. Cell participation ratio was obtained dividing the number  
360 of robustly participating neurons by the total number of recorded neurons for that session.  
361 Organizing the average time lag for robustly participating neurons in increasing order defined  
362 the template order for the ripple. For each SPW-R, the reliability of activation respect to the  
363 template was calculated via the Spearman rank correlation between the activation order of that  
364 SPW-R and the template order. To calculate this correlation, only the neurons that belong to the  
365 template order were considered. A correlation above 95% confidence interval was considered  
366 reliable.

## 367 **Statistics**

368 All results reported are based on a significance threshold  $\alpha=0.05$ , otherwise stated, and all  
369 groups included enough samples to enable rejection of the null hypothesis at that level. We used  
370 two sample Kolmogorov-Smirnov test to assess differences between distributions, and t-  
371 Student's test to evaluate differences in the mean of distributions. Correlation tests involving  
372 ranked variables (neuron indices and electrode sites) were performed via a Spearman rank  
373 correlation. We tested significant differences between percentages with a two proportion Z-test.

## 374 **REFERENCES**

375 Ali, M., Cholvin, T., Muller, M. A., Cosquer, B., Kelche, C., Cassel, J.-C. & Pereira De  
376 Vasconcelos, A. 2017. Environmental enrichment enhances systems-level consolidation of a  
377 spatial memory after lesions of the ventral midline thalamus. *Neurobiology of learning and*  
378 *memory*, **141**, 108-123. DOI: 10.1016/j.nlm.2017.03.021

- 379 Battaglia, F. P., Benchenane, K., Sirota, A., Pennartz, C. M. & Wiener, S. I. 2011. The  
380 hippocampus: hub of brain network communication for memory. *Trends Cogn Sci*, **15**, 310-318.  
381 DOI: 10.1016/j.tics.2011.05.008
- 382 Battaglia, F. P., Sutherland, G. R. & Mcnaughton, B. L. 2004. Hippocampal sharp wave bursts  
383 coincide with neocortical "up-state" transitions. *Learning & memory*, **11**, 697-704. DOI:  
384 10.1101/lm.73504
- 385 Berens, P. 2009. CircStat: A MATLAB Toolbox for Circular Statistics. *Journal of Statistical*  
386 *Software*, **31**, 1-21. DOI: 10.18637/jss.v031.i10
- 387 Bermudez Contreras, E. J., Schjetnan, A. G. P., Muhammad, A., Bartho, P., Mcnaughton, B. L.,  
388 Kolb, B., Gruber, A. J. & Luczak, A. 2013. Formation and reverberation of sequential neural  
389 activity patterns evoked by sensory stimulation are enhanced during cortical desynchronization.  
390 *Neuron*, **79**, 555-66. DOI: 10.1016/j.neuron.2013.06.013
- 391 Bokor, H., Csáki, A., Kocsis, K. & Kiss, J. 2002. Cellular architecture of the nucleus reuniens  
392 thalami and its putative aspartatergic/glutamatergic projection to the hippocampus and medial  
393 septum in the rat. *The European journal of neuroscience*, **16**, 1227-39. DOI: 10.1046/j.1460-  
394 9568.2002.02189.x
- 395 Buzsáki, G. 2015. Hippocampal sharp wave-ripple: A cognitive biomarker for episodic memory  
396 and planning. *Hippocampus*, **25**, 1073-188. DOI: 10.1002/hipo.22488
- 397 Cassel, J. C., Pereira De Vasconcelos, A., Loureiro, M., Cholvin, T., Dalrymple-Alford, J. C. &  
398 Vertes, R. P. 2013. The reuniens and rhomboid nuclei: neuroanatomy, electrophysiological  
399 characteristics and behavioral implications. *Progress in neurobiology*, **111**, 34-52. DOI:  
400 10.1016/j.pneurobio.2013.08.006
- 401 Cholvin, T., Hok, V., Giorgi, L., Chaillan, F. A. & Poucet, B. 2018. Ventral Midline Thalamus Is  
402 Necessary for Hippocampal Place Field Stability and Cell Firing Modulation. *J Neurosci*, **38**, 158-  
403 172. DOI: 10.1523/JNEUROSCI.2039-17.2017

- 404 Clement, E. A., Richard, A., Thwaites, M., Ailon, J., Peters, S. & Dickson, C. T. 2008. Cyclic and  
405 sleep-like spontaneous alternations of brain state under urethane anaesthesia. *PloS one*, **3**,  
406 e2004-e2004. DOI: 10.1371/journal.pone.0002004
- 407 Csicsvari, J., Hirase, H., Czurko, A., Mamiya, A. & Buzsáki, G. 1999. Oscillatory coupling of  
408 hippocampal pyramidal cells and interneurons in the behaving Rat. *Journal of Neuroscience*, **19**,  
409 274-287. DOI: 10.1523/JNEUROSCI.19-01-00274.1999
- 410 Davidson, T. J., Kloosterman, F. & Wilson, M. A. 2009. Hippocampal replay of extended  
411 experience. *Neuron*, **63**, 497-507. DOI: 10.1016/j.neuron.2009.07.027
- 412 Di Prisco, G. V. & Vertes, R. P. 2006. Excitatory actions of the ventral midline thalamus  
413 (rhomboid/reuniens) on the medial prefrontal cortex in the rat. *Synapse*, **60**, 45-55. DOI:  
414 10.1002/syn.20271
- 415 Dolleman-Van Der Weel, M. J., Lopes Da Silva, F. H. & Witter, M. P. 1997. Nucleus reuniens  
416 thalami modulates activity in hippocampal field CA1 through excitatory and inhibitory  
417 mechanisms. *Journal of neuroscience*, **17**, 5640-50. DOI: 10.1523/JNEUROSCI.17-14-  
418 05640.1997
- 419 Dolleman-Van Der Weel, M. J. & Witter, M. P. 1996. Projections from the nucleus reuniens  
420 thalami to the entorhinal cortex, hippocampal field CA1, and the subiculum in the rat arise from  
421 different populations of neurons. *The Journal of comparative neurology*, **364**, 637-50. DOI:  
422 10.1002/(SICI)1096-9861(19960122)364:4<637::AID-CNE3>3.0.CO;2-4
- 423 Dolleman-Van Der Weel, M. J. & Witter, M. P. 2000. Nucleus reuniens thalami innervates gamma  
424 aminobutyric acid positive cells in hippocampal field CA1 of the rat. *Neuroscience letters*, **278**,  
425 145-8. DOI: 10.1016/S0304-3940(99)00935-0
- 426 Dragoi, G. & Buzsáki, G. 2006. Temporal encoding of place sequences by hippocampal cell  
427 assemblies. *Neuron*, **50**, 145-157. DOI: 10.1016/j.neuron.2006.02.023 [doi]
- 428 Dragoi, G. & Tonegawa, S. 2012. Preplay of future place cell sequences by hippocampal cellular  
429 assemblies. *Nature*, **469**, 397-401. DOI: 10.1038/nature09633

- 430 Eichenbaum, H. 2017. Prefrontal-hippocampal interactions in episodic memory. *Nature Rev.*  
431 *Neurosci.*, **18**, 547-558. DOI: 10.1038/nrn.2017.74
- 432 Euston, D. R., Tatsuno, M. & McNaughton, B. L. 2007. Fast-forward playback of recent memory  
433 sequences in prefrontal cortex during sleep. *Science*, **318**, 1147-50. DOI:  
434 10.1126/science.1148979
- 435 Ferezou, I., Bolea, S. & Petersen, C. C. 2006. Visualizing the cortical representation of whisker  
436 touch: voltage-sensitive dye imaging in freely moving mice. *Neuron*, **50**, 617-29. DOI:  
437 10.1016/j.neuron.2006.03.043
- 438 Ferraris, M., Ghestem, A., Vicente, A. F., Nallet-Khosrofiyan, L., Bernard, C. & Quilichini, P. P.  
439 2018. The Nucleus Reuniens Controls Long-Range Hippocampo-Prefrontal Gamma  
440 Synchronization during Slow Oscillations. *J Neurosci*, **38**, 3026-3038. DOI:  
441 10.1523/JNEUROSCI.3058-17.2018
- 442 Foster, D. J. & Wilson, M. A. 2006. Reverse replay of behavioural sequences in hippocampal  
443 place cells during the awake state. *Nature*, **440**, 680-683. DOI: 10.1038/nature04587 [doi]
- 444 Frankland, P. W. & Bontempi, B. 2005. The organization of recent and remote memories. *Nature*  
445 *Reviews Neuroscience*, **6**, 119-130. DOI: 10.1101/lm.97905
- 446 Harris, K. D., Csicsvari, J., Hirase, H., Dragoi, G. & Buzsáki, G. 2003. Organization of cell  
447 assemblies in the hippocampus. *Nature*, **424**, 552-556. DOI: 10.1038/nature01834
- 448 Hazan, L., Zugaro, M. & Buzsáki, G. 2006. Klusters, NeuroScope, NDManager: a free software  
449 suite for neurophysiological data processing and visualization. *J Neurosci Methods*, **155**, 207-  
450 216. DOI: 10.1016/j.jneumeth.2006.01.017
- 451 Herkenham, M. 1978. The connections of the nucleus reuniens thalami: evidence for a direct  
452 thalamo-hippocampal pathway in the rat. *The Journal of comparative neurology*, **177**, 589-610.  
453 DOI: 10.1002/cne.901770405
- 454 Hutt, A. 2011. *Sleep and Anesthesia; Neural correlates in Theory and experiment*, Springer.  
455 10.1007/978-1-4614-0173-5: 10.1007/978-1-4614-0173-5

- 456 Isomura, Y., Sirota, A., Ozen, S., Montgomery, S., Mizuseki, K., Henze, D. A. & Buzsáki, G. 2006.  
457 Integration and segregation of activity in entorhinal-hippocampal subregions by neocortical slow  
458 oscillations. *Neuron*, **52**, 871-882. DOI: 10.1016/j.neuron.2006.10.023
- 459 Ito, H. T., Zhang, S.-J., Witter, M. P., Moser, E. I. & Moser, M.-B. 2015. A prefrontal–thalamo–  
460 hippocampal circuit for goal-directed spatial navigation. *Nature*, **522**, 50-55. DOI:  
461 10.1038/nature14396
- 462 Jankowski, M. M., Islam, M. N., Wright, N. F., Vann, S. D., Erichsen, J. T., Aggleton, J. P. &  
463 O'mara, S. M. 2014. Nucleus reuniens of the thalamus contains head direction cells. *eLife*, **3**,  
464 e03075-e03075. DOI: 10.7554/eLife.03075
- 465 Jankowski, M. M., Passecker, J., Islam, M. N., Vann, S., Erichsen, J. T., Aggleton, J. P. & O'mara,  
466 S. M. 2015. Evidence for spatially-responsive neurons in the rostral thalamus. *Frontiers in*  
467 *Behav. Neurosci.*, **9**, 256-256. DOI: 10.3389/fnbeh.2015.00256
- 468 Ji, D. & Wilson, M. A. 2007. Coordinated memory replay in the visual cortex and hippocampus  
469 during sleep. *Nature Neuroscience*, **10**, 100-107. DOI: 10.1038/nn1825
- 470 Jones, E. G. 1985. *The Thalamus*, Plenum Press, New York 1985, Springer. 10.1007/978-1-  
471 4615-1749-8: 10.1007/978-1-4615-1749-8
- 472 Kenet, T., Bibitchkov, D., Tsodyks, M., Grinvald, A. & Arieli, A. 2003. Spontaneously emerging  
473 cortical representations of visual attributes. *Nature*, **425**, 954-6. DOI: 10.1038/nature02078
- 474 Khodagholy, D., Gelinas, J. N. & Buzsaki, G. 2017. Learning-enhanced coupling between ripple  
475 oscillations in association cortices and hippocampus. *Science*, **358**, 369-372. DOI:  
476 10.1126/science.aan6203
- 477 Kitamura, T., Ogawa, S. K., Roy, D. S., Okuyama, T., Morrissey, M. D., Smith, L. M., Redondo, R.  
478 L. & Tonegawa, S. 2017. Engrams and circuits crucial for systems consolidation of a memory.  
479 *Science*, **356**, 73-78. DOI: 10.1126/science.aam6808
- 480 Lansink, C. S., Goltstein, P. M., Lankelma, J. V., Mcnaughton, B. L. & Pennartz, C. M. 2009.  
481 Hippocampus leads ventral striatum in replay of place-reward information. *PLoS Biol*, **7**,  
482 e1000173-e1000173. DOI: 10.1371/journal.pbio.1000173

- 483 Latchoumane, C.-F. V., Ngo, H.-V. V., Born, J. & Shin, H.-S. 2017. Thalamic Spindles Promote  
484 Memory Formation during Sleep through Triple Phase-Locking of Cortical, Thalamic, and  
485 Hippocampal Rhythms. *Neuron*, **95**, 424-435. DOI: 10.1016/j.neuron.2017.06.025
- 486 Lee, A. K. & Wilson, M. A. 2002. Memory of sequential experience in the hippocampus during  
487 slow wave sleep. *Neuron*, **36**, 1183-1194. DOI: 10.1016/S0896-6273(02)01096-6
- 488 Liu, K., Sibille, J. & Dragoi, G. 2018. Preconfigured patterns are the primary driver of offline  
489 multi-neuronal sequence replay. *Hippocampus*. DOI: 10.1002/hipo.23034
- 490 Loureiro, M., Cholvin, T., Lopez, J., Merienne, N., Latreche, A., Cosquer, B., Geiger, K., Kelche,  
491 C., Cassel, J.-C. & Pereira De Vasconcelos, A. 2012. The ventral midline thalamus (reuniens and  
492 rhomboid nuclei) contributes to the persistence of spatial memory in rats. *Journal of*  
493 *Neuroscience*, **32**, 9947-59. DOI: 10.1523/JNEUROSCI.0410-12.2012
- 494 Luczak, A., Bartho, P., Marguet, S. L., Buzsáki, G. & Harris, K. D. 2007. Sequential structure of  
495 neocortical spontaneous activity in vivo. *PNAS*, **104**, 347-352. DOI: 10.1073/pnas.0605643104
- 496 Luczak, A. & Maclean, J. N. 2012. Default activity patterns at the neocortical microcircuit level.  
497 *Frontiers in integrative neuroscience*, **6**, 30-30. DOI: 10.3389/fnint.2012.00030
- 498 Luczak, A., McNaughton, B. L. & Harris, K. D. 2015. Packet-based communication in the cortex.  
499 *Nature Reviews Neuroscience*, **16**, 745-755. DOI: 10.1038/nrn4026
- 500 Maass, W. 2016. Searching for principles of brain computation. *Current Opinion in Behavioral*  
501 *Sciences*, **11**, 81-92. DOI: 10.1016/j.cobeha.2016.06.003
- 502 Maclean, J. N., Watson, B. O., Aaron, G. B. & Yuste, R. 2005. Internal dynamics determine the  
503 cortical response to thalamic stimulation. *Neuron*, **48**, 811-23. DOI:  
504 10.1016/j.neuron.2005.09.035
- 505 Maingret, N., Girardeau, G., Todorova, R., Goutierre, M. & Zugaro, M. 2016. Hippocampo-cortical  
506 coupling mediates memory consolidation during sleep. *Nature neuroscience*, **19**, 959-64. DOI:  
507 10.1038/nn.4304



- 508 Malvache, A., Reichinnek, S., Villette, V., Haimerl, C. & Cossart, R. 2016. Awake hippocampal  
509 reactivations project onto orthogonal neuronal assemblies. *Science*, **353**, 1280-3. DOI:  
510 10.1126/science.aaf3319
- 511 Marre, O., Yger, P., Davison, A. P. & Frégnac, Y. 2009. Reliable Recall of Spontaneous Activity  
512 Patterns in Cortical Networks. *Journal of Neuroscience*, **29**, 14596-14606. DOI:  
513 10.1523/JNEUROSCI.0753-09.2009
- 514 Mckenna, J. T. & Vertes, R. P. 2004. Afferent projections to nucleus reuniens of the thalamus.  
515 *The Journal of comparative neurology*, **480**, 115-42. DOI: 10.1002/cne.20342
- 516 Nádasdy, Z. 2000. Spike sequences and their consequences. *Journal of physiology, Paris*, **94**,  
517 505-24. DOI: 10.1016/S0928-4257(00)01103-7
- 518 Nadasdy, Z., Hirase, H., Czurko, A., Csicsvari, J. & Buzsáki, G. 1999. Replay and time  
519 compression of recurring spike sequences in the hippocampus. *Journal of Neuroscience*, **19**,  
520 9497-9507. DOI: 10.1523/JNEUROSCI.19-21-09497.1999
- 521 Pastalkova, E., Itskov, V., Amarasingham, A. & Buzsáki, G. 2008. Internally generated cell  
522 assembly sequences in the rat hippocampus. *Science*, **321**, 1322-1327. DOI:  
523 10.1126/science.1159775
- 524 Pereira De Vasconcelos, A. & Cassel, J.-C. 2015. The nonspecific thalamus: A place in a  
525 wedding bed for making memories last? *Neurosci. & biobehav. rev.*, **54**, 175-96. DOI:  
526 10.1016/j.neubiorev.2014.10.021
- 527 Peyrache, A., Khamassi, M., Benchenane, K., Wiener, S. I. & Battaglia, F. P. 2009. Replay of rule-  
528 learning related neural patterns in the prefrontal cortex during sleep. *Nature neuroscience*, **12**,  
529 919-26. DOI: 10.1038/nn.2337
- 530 Pfeiffer, B. E. 2017. The Content of Hippocampal "Replay". *Hippocampus*, 1-13. DOI:  
531 10.1002/hipo.22824
- 532 Preston, A. R. & Eichenbaum, H. 2013. Interplay of hippocampus and prefrontal cortex in  
533 memory. *Current biology : CB*, **23**, R764-73. DOI: 10.1016/j.cub.2013.05.041



- 534 Quilichini, P., Sirota, A. & Buzsáki, G. 2010. Intrinsic circuit organization and theta-gamma  
535 oscillation dynamics in the entorhinal cortex of the rat. *J Neurosci*, **30**, 11128-11142. DOI:  
536 10.1523/JNEUROSCI.1327-10.2010
- 537 Sanchez-Vives, M. V. & Mattia, M. 2014. Slow wave activity as the default mode of the cerebral  
538 cortex. *Archives Italiennes de Biologie*, **152**, 147-155. DOI: 10.12871/000298292014239
- 539 Siapas, A. G. & Wilson, M. A. 1998. Coordinated interactions between hippocampal ripples and  
540 cortical spindles during slow-wave sleep. *Neuron*, **21**, 1123-8. DOI: S0896-6273(00)80629-7
- 541 Sirota, A. & Buzsáki, G. 2005. Interaction between neocortical and hippocampal networks via  
542 slow oscillations. *Thalamus & related systems*, **3**, 245-259. DOI: 10.1017/S1472928807000258
- 543 Sirota, A., Csicsvari, J., Buhl, D. & Buzsáki, G. 2003. Communication between neocortex and  
544 hippocampus during sleep in rodents. *PNAS*, **100**, 2065-9. DOI: 10.1073/pnas.0437938100
- 545 Skaggs, W. E. & McNaughton, B. L. 1996. Replay of neuronal firing sequences in rat  
546 hippocampus during sleep following spatial experience. *Science*, **271**, 1870-1873. DOI:  
547 10.1126/science.271.5257.1870
- 548 Staresina, B. P., Ole Bergmann, T., Bonnefond, M., Van Der Meij, R., Jensen, O., Deuker, L.,  
549 Elger, C. E., Axmacher, N. & Fell, J. 2015. Hierarchical nesting of slow oscillations, spindles and  
550 ripples in the human hippocampus during sleep. *Nature Neuroscience*, **18**, 1679-1686. DOI:  
551 10.1038/nn.4119
- 552 Tonegawa, S., Morrissey, M. D. & Kitamura, T. 2018. The role of engram cells in the systems  
553 consolidation of memory. *Nat Rev Neurosci*, **19**, 485-498. DOI: 10.1038/s41583-018-0031-2
- 554 Tung, A. & Mendelson, W. B. 2004. Anesthesia and sleep. *Sleep Med Rev*, **8**, 213-25. DOI:  
555 10.1016/j.smrv.2004.01.003
- 556 Van Der Werf, Y. D., Witter, M. P. & Groenewegen, H. J. 2002. The intralaminar and midline  
557 nuclei of the thalamus. Anatomical and functional evidence for participation in processes of  
558 arousal and awareness. *Brain Res Brain Res Rev*, **39**, 107-140. DOI: S0165017302001819

- 559 Varela, C., Kumar, S., Yang, J. Y. & Wilson, M. A. 2014. Anatomical substrates for direct  
560 interactions between hippocampus, medial prefrontal cortex, and the thalamic nucleus reuniens.  
561 *Brain Struct Funct*, **219**, 911-29. DOI: 10.1007/s00429-013-0543-5
- 562 Vertes, R. P. 2006. Interactions among the medial prefrontal cortex, hippocampus and midline  
563 thalamus in emotional and cognitive processing in the rat. *Neuroscience*, **142**, 1-20. DOI:  
564 10.1016/j.neuroscience.2006.06.027
- 565 Vertes, R. P., Hoover, W. B., Do Valle, A. C., Sherman, A. & Rodriguez, J. J. 2006. Efferent  
566 projections of reuniens and rhomboid nuclei of the thalamus in the rat. *The Journal of*  
567 *comparative neurology*, **499**, 768-96. DOI: 10.1002/cne.21135
- 568 Villette, V., Malvache, A., Tressard, T., Dupuy, N., Villette, V., Malvache, A., Tressard, T., Dupuy,  
569 N. & Cossart, R. 2015. Internally Recurring Hippocampal Sequences as a Population Template  
570 of Spatiotemporal Information Article Internally Recurring Hippocampal Sequences as a  
571 Population Template of Spatiotemporal Information. *Neuron*, **88**, 357-366. DOI:  
572 10.1016/j.neuron.2015.09.052
- 573 Walsh, D. A., Brown, J. T. & Randall, A. D. 2017. In vitro characterization of cell-level  
574 neurophysiological diversity in the rostral nucleus reuniens of adult mice. *J Physiol*, **595**, 3549-  
575 3572. DOI: 10.1113/JP273915

## 576 FIGURES & FIGURE LEGENDS

### 577 **Figure 1. Sequential dynamics of cell assemblies.**

578 **A)** Two template heat maps of normalized NR unit activities (top) with **(a)** mPFC or **(b)** HPC  
579 normalized unit activities showing the repetition of neuronal assemblies particularly in NR and  
580 mPFC. The upper trace depicts the [0.5-2] Hz filtered LFP in **(a)** mPFC and **(b)** NR, where the  
581 UP states correspond to troughs in the LFP signal.

582 **B) (a)** Phase distribution of the NR, mPFC, HPC and TH population firing (grouped data) as a  
583 reference to SO phase (depicted by the dashed curve). **(b)** Heat maps of normalized distribution  
584 of neurons preferred SO phase for NR, mPFC, HPC and TH. The activation order for each  
585 neuron is calculated as the average preferred phase. Heat maps are ordered according to the  
586 increasing value of average preferred phase (colored circles), defining the sequential activation  
587 template.

588 **C)** Percentage of reliable sequences detected in the NR, mPFC, HPC and TH.

589 **D)** Average Spearman correlation of reliable sequences only found in NR and mPFC.

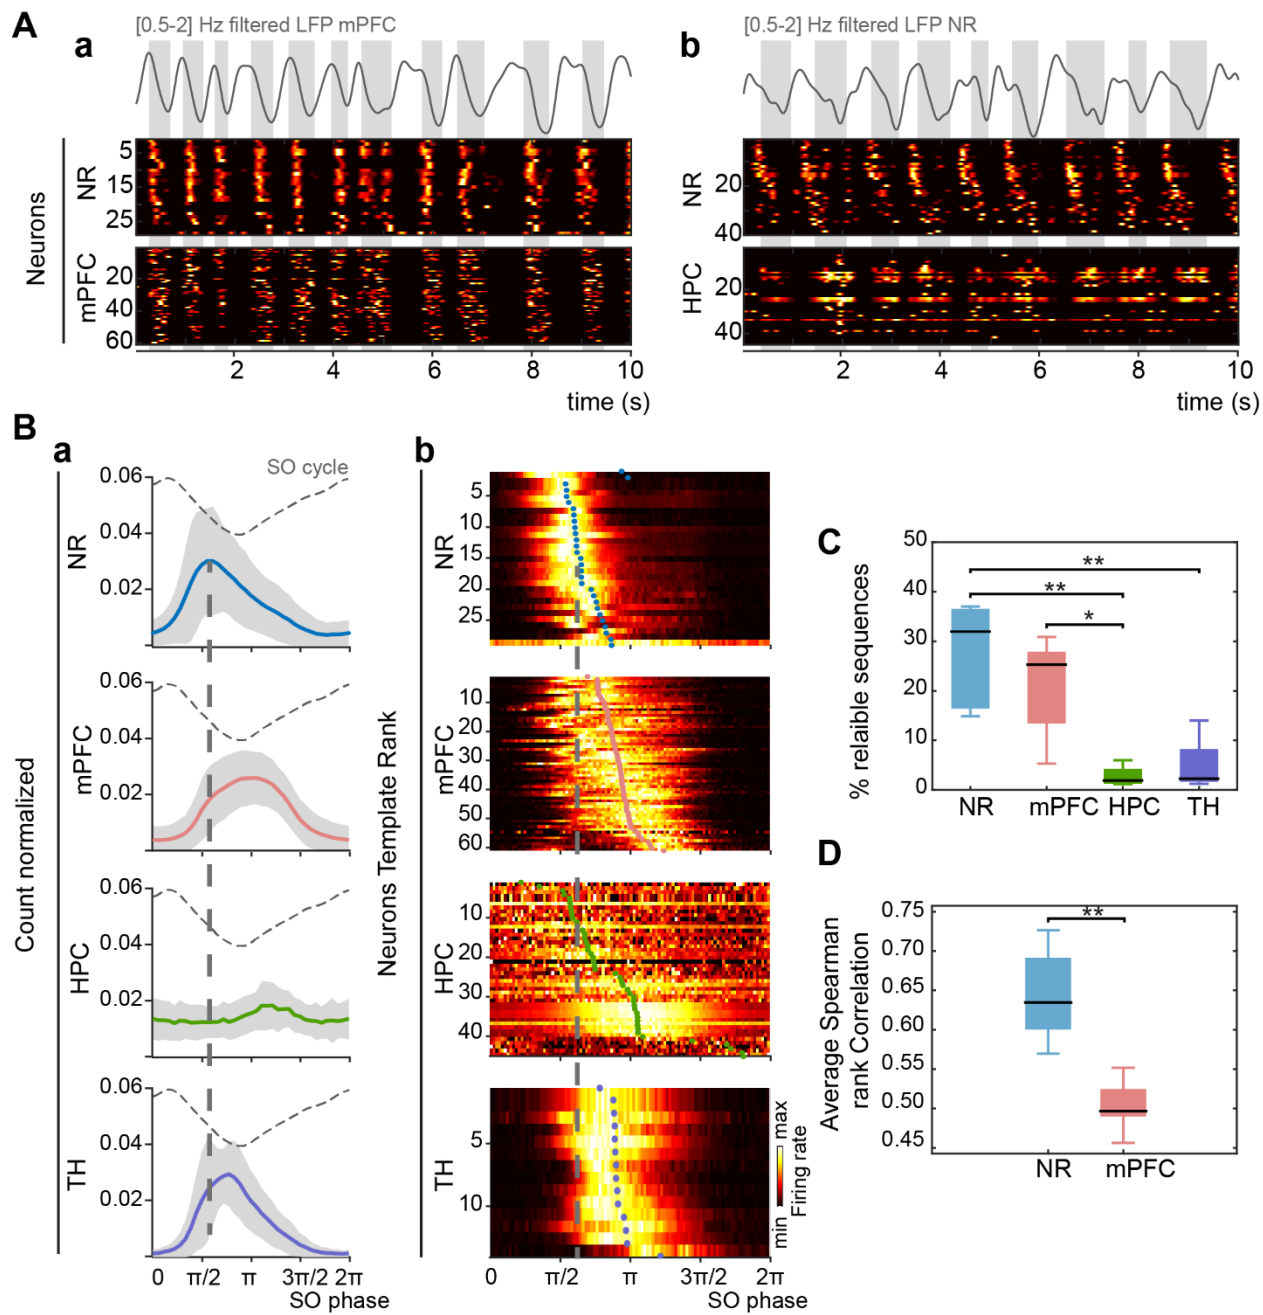

590

591 *Figure 1. Sequential dynamics of cell assemblies.*

592 **Figure 2. Spatial organization of NR and mPFC cell assemblies.**

593 **A)** Representation of the position of a linear silicon probe with 32 recording sites in **(a)** the NR  
594 and **(b)** mPFC. NR and mPFC contours (and layers) are delimited by the white dashed line over  
595 the green fluorescent Nissl staining (fmi: forceps minor of the corpus callosum; 3<sup>rd</sup> V: third  
596 ventricle; PrL: prelimbic area; IL: infralimbic area). The red-orange staining corresponds to the  
597 Dil that was deposited at the back of the silicon probe before insertion (D: dorsal; L: lateral).

598 **B)** Relationship between anatomical dorso-ventral location of NR (left panel) and mPFC (right  
599 panel) neurons (location defined by the site of the probe recording the maximum amplitude of  
600 the action potentials) and the template rank showing a linear correlation for NR neurons but not  
601 for mPFC ones in a template experiment.

602 **C)** Distribution of spatial propagation velocities across the probe for a template simultaneous  
603 recording of mPFC (red) and NR (blue) neurons.

604 **D)** Mean propagation time across experiments for NR and mPFC.

605 **E)** Percentage of spatially propagating cases found in NR and mPFC.

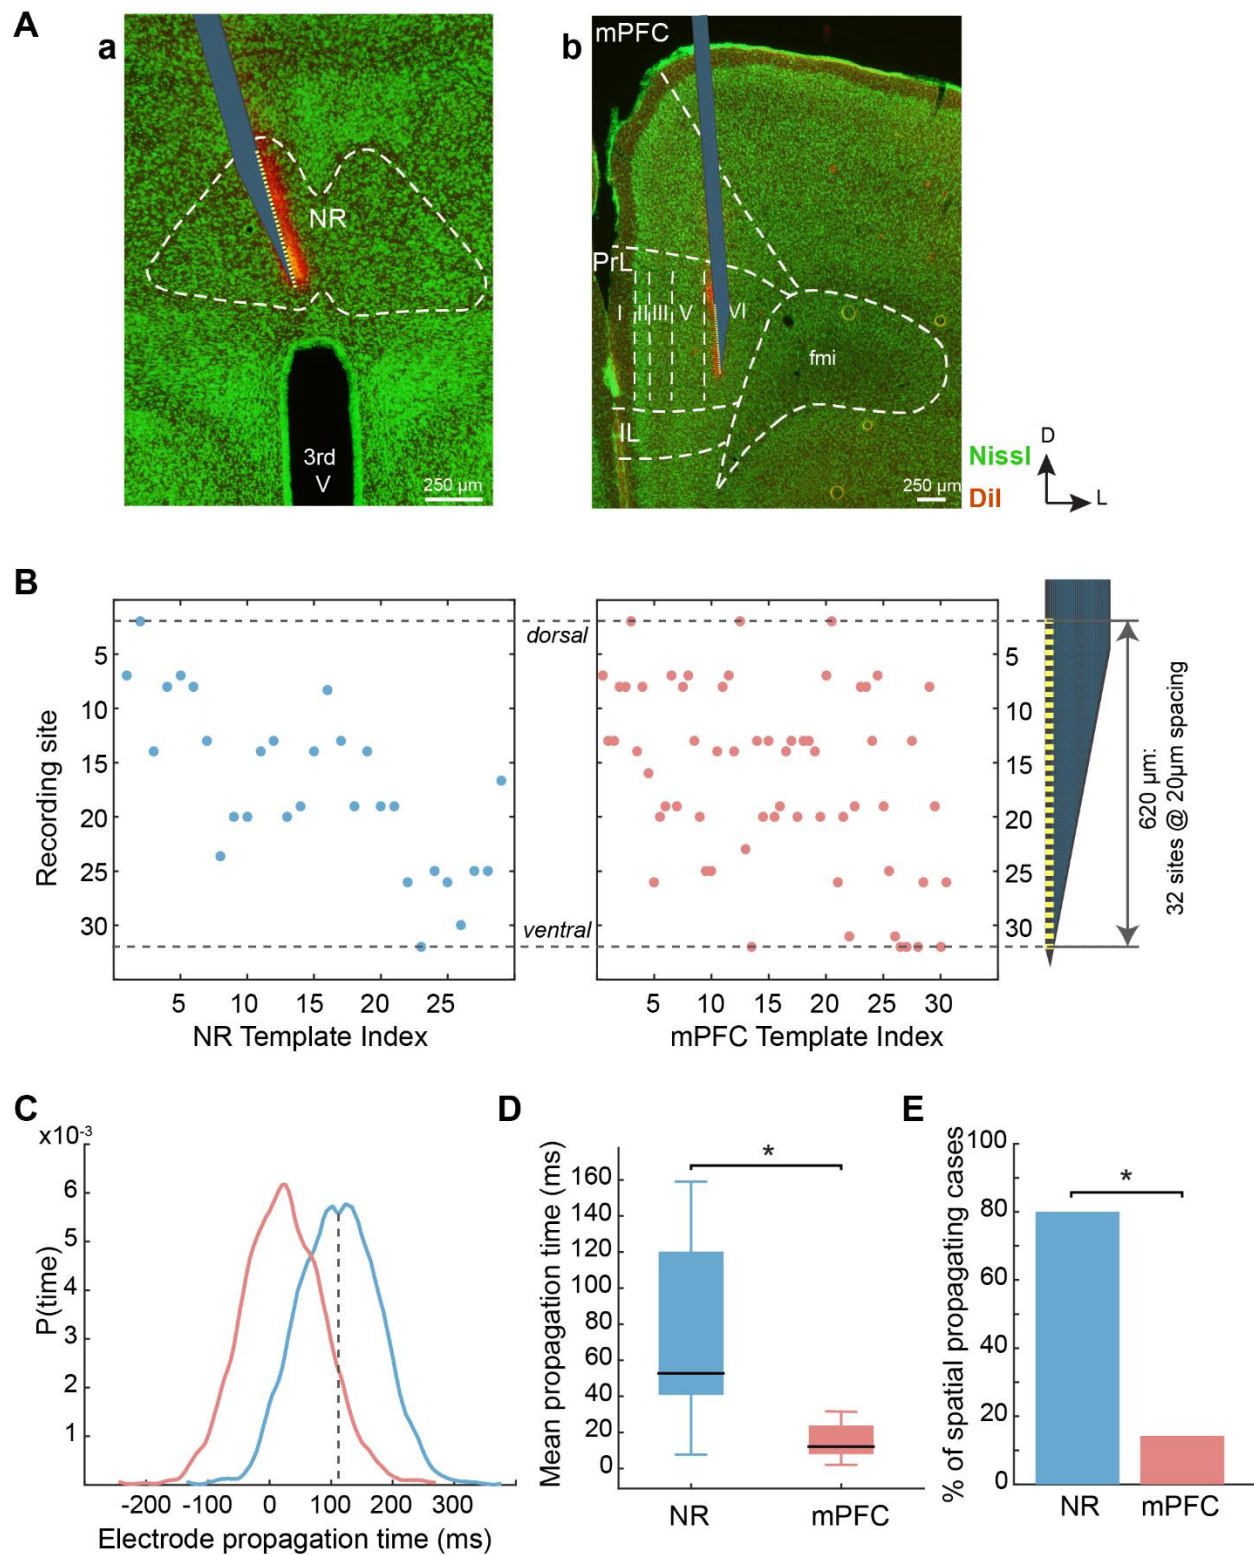

606

607 *Figure 2. Spatial organization of NR and mPFC cell assemblies.*

608 **Figure 3. Inactivation of NR impairs reliable sequential activation of mPFC neurons**  
609 **at the beginning of the UP state.**

610 **A)** Two template heat maps of normalized mPFC unit activities in control and during NR  
611 inactivation condition showing less stable cell assemblies. The upper traces depict the [0.5-2] Hz  
612 filtered LFP in mPFC, where the UP states correspond to troughs in the LFP signal.

613 **B)** Inter-spike interval distribution of mPFC neurons grouped data for control (red) and NR  
614 inactivation condition (purple).

615 **C)** Grouped data of the variability of the APTH for control (CTR) and NR inactivation conditions  
616 (MSCI). Insert: APTH: the activity peak triggered histogram quantifies the lag distribution with  
617 respect to the population activity peak for each neuron.

618 **D)** Distribution of the duration of the UP state in control (red) and NR inactivation (purple)  
619 condition, where a peak at short values indicates the emergence of shorter UP states.

620 **E)** Number of reliable sequences found in mPFC when NR is inactivated (MSCI) as compared to  
621 control (CTR) condition (grouped data, n=3 experiments).

622 **F)** Neurons participation to the reliable sequences (MSCI versus CTR, grouped data).



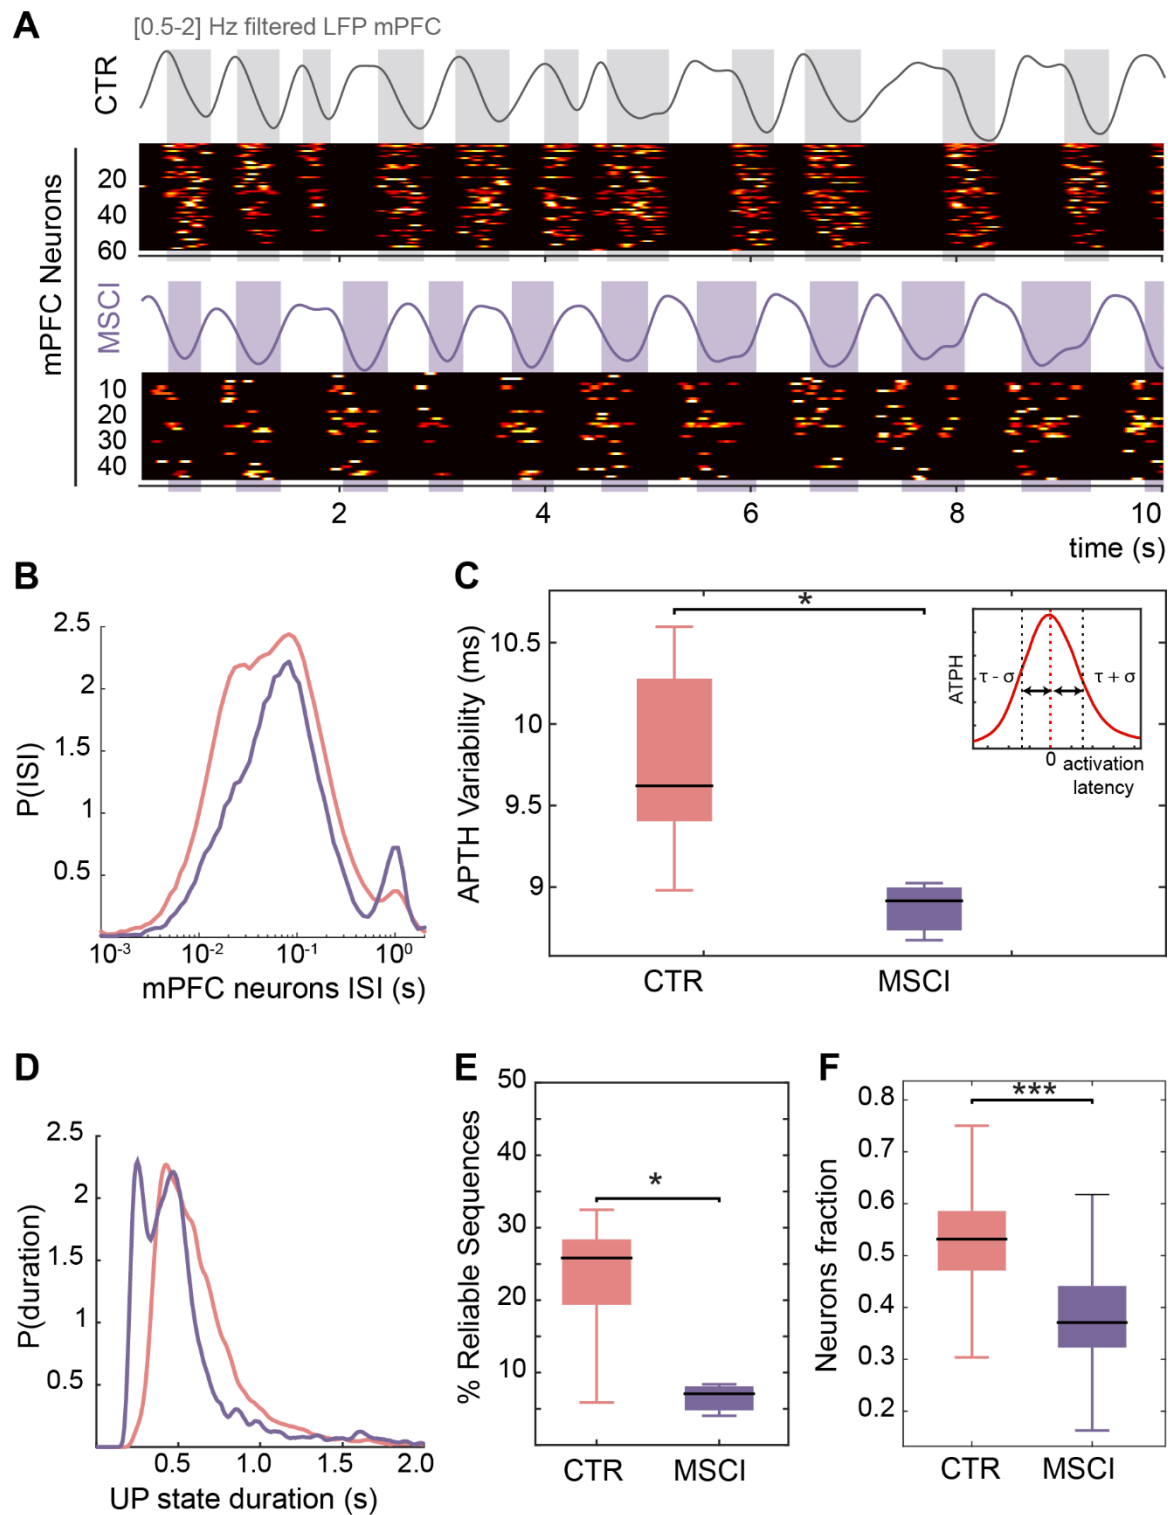

623

624 *Figure 3. Inactivation of NR impairs reliable sequential activation of mPFC neurons at*  
 625 *the beginning of the UP state.*



626 **Figure 4: Inactivation of NR impairs reliable sequential activation of HPC neurons**  
627 **during SPW-Rs.**

628 **A)** Two template heat maps of normalized HPC unit activities in control (CTR) and NR  
629 inactivation (MSCI) condition. The upper traces depict the [0.5-2] Hz filtered LFP in mPFC,  
630 where the UP states correspond to troughs in the LFP signal, and the black arrow mark the  
631 presence of a SPW-R event.

632 **B)** SPW-Rs occurrence is not changed when NR is inactivated (grouped data, n=3 experiments,  
633 n=913 SPW-R events in CTR, n=89 SPW-R events in MSCI).

634 **C)** SPW-R events normalized power and inner frequency in control versus NR inactivation  
635 conditions.

636 **D)** Proportion of reliable cell assemblies during SPW-Rs in control (CTR) and NR inactivation  
637 (MSCI) condition.

638 **E)** Fraction of reliably participating HPC neurons to sequences during SPW-R events in control  
639 and NR inactivation conditions.

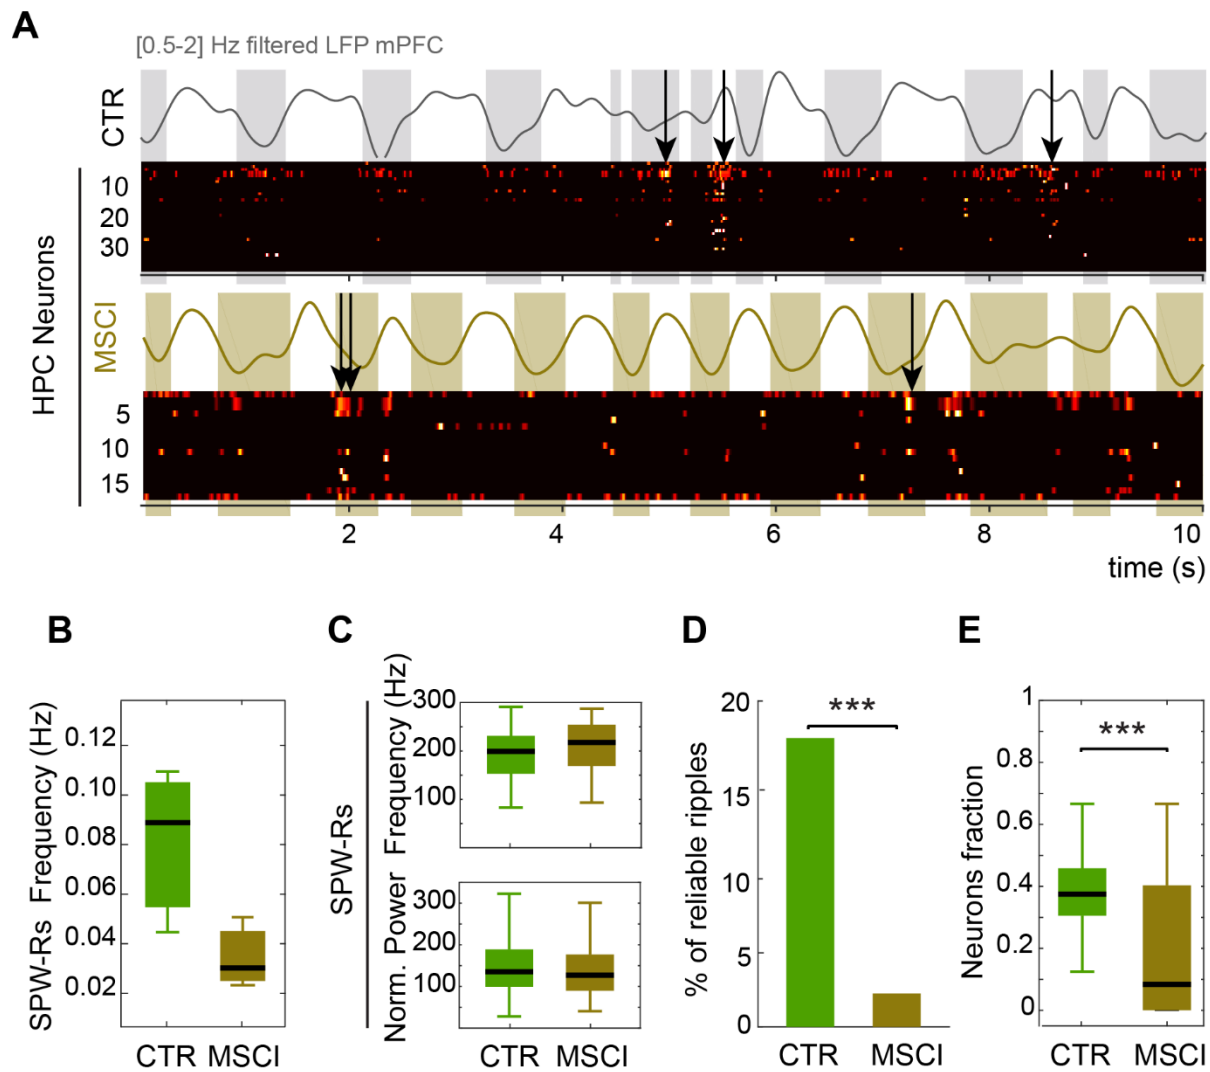

640

641 *Figure 4: Inactivation of NR impairs reliable sequential activation of HPC neurons during*  
642 *SPW-Rs.*
